# Supplementary material
Source: MDPI journal article supplement (https://www.mdpi.com/2227-9040/9/6/148)
Supplement: s1 [file s1]

## Electronic Supplementary Material

### **Sensing atrazine herbicide degradation products through their interactions with humic substances by surface-enhanced Raman scattering**

G. Zanasi<sup>a</sup>, R. J. G. Rubira<sup>b</sup>, O. Francioso<sup>a</sup>, M. V. Cañamares<sup>c</sup>,  
C.J.L. Constantino<sup>b</sup>, S. Sanchez-Cortes<sup>c</sup>

<sup>a</sup>Dipartimento di Scienze e Tecnologie Agro-Alimentari, V.le Fanin 40, 40127- Bologna, Italy

<sup>b</sup>São Paulo State University (UNESP), School of Technology and Applied Sciences, 19060-900, Presidente Prudente, SP, Brazil.

<sup>c</sup>Instituto de Estructura de la Materia, IEM-CSIC, Serrano 121, E-28006-Madrid, Spain

\*Corresponding authors:

Rafael Jesus Gonçalves Rubira. São Paulo State University (UNESP), School of Technology and Applied Sciences, 19060-900, Presidente Prudente, SP, Brazil; [rafael.gon.fis@gmail.com](mailto:rafael.gon.fis@gmail.com)  
Santiago Sanchez-Cortes, Instituto de Estructura de la Materia (IEM-CSIC), Serrano 121, E-28006-Madrid, Spain; [s.sanchez.cortes@csic.es](mailto:s.sanchez.cortes@csic.es)

**Table S1.** Assignments of this spectra DEHA keto and enolic form bands assignment. Note: calc.–calculated wavenumbers ( $\text{cm}^{-1}$ ); expt.–experimental wavenumbers ( $\text{cm}^{-1}$ );  $\delta_w$ –wagging;  $\nu$ –stretching;  $\delta_{sc}$ –scissoring;  $\rho$ –rocking;  $\delta_{tw}$ –twisting;  $\delta$ –in plane deformation;  $\gamma$ –out-of-plane deformation; asymm.–asymmetrical; symm.–symmetrical; def.–deformation; bend.–bending.

| Calc.     |         | Expt.       |             | Assignment                                                               |
|-----------|---------|-------------|-------------|--------------------------------------------------------------------------|
| Raman     |         | Raman       | SERS        |                                                                          |
| Keto form | Scaled  |             |             |                                                                          |
| 173.27    | 175.28  | <b>173</b>  |             | Skeletal vibration                                                       |
| 198.27    | 200.58  | <b>193</b>  |             | Skeletal vibration                                                       |
|           |         |             | <b>210</b>  | Ag-O vibration                                                           |
| 228.29    | 230.96  | <b>219</b>  |             | Skeletal vibration                                                       |
| 241.70    | 244.52  |             |             | Skeletal vibration                                                       |
| 277.19    | 280.43  |             |             | Skeletal vibration                                                       |
| 313.73    | 319.28  | <b>310</b>  |             | $\delta_w$ NH <sub>2</sub>                                               |
| 351.46    | 355.57  | <b>360</b>  | <b>327</b>  | $\delta$ N-C-N                                                           |
| 394.96    | 399.58  |             |             | $\delta$ C-C-C                                                           |
| 425.26    | 430.23  | <b>420</b>  |             | $\gamma$ C-N-C                                                           |
| 465.31    | 470.65  | <b>448</b>  | <b>448</b>  | $\gamma$ N-H; $\gamma$ N-H                                               |
| 504.03    | 509.93  |             |             | $\gamma$ ring; $\delta$ N-C-C                                            |
| 536.82    | 543.10  | <b>489</b>  | <b>489</b>  | $\delta$ ring; $\gamma$ N-H                                              |
| 539.42    | 545.73  | <b>565</b>  | <b>593</b>  | $\gamma$ N-H                                                             |
| 564.59    | 571.19  | <b>578</b>  |             | $\delta_{tw}$ NH <sub>2</sub> ; $\gamma$ N-H                             |
| 578.43    | 585.20  | <b>609</b>  | <b>643</b>  | $\delta$ ring; $\gamma$ N-H; $\delta_{tw}$ NH <sub>2</sub>               |
| 612.96    | 620.13  | <b>640</b>  | <b>670</b>  | $\gamma$ ring; $\nu$ C-N                                                 |
|           |         |             | <b>799</b>  | $\gamma$ ring                                                            |
| 819.03    | 828.61  | <b>746</b>  | <b>746</b>  | symm. $\nu$ CH-C-CH <sub>3</sub>                                         |
| 935.06    | 946.00  | <b>853</b>  | <b>853</b>  | $\nu$ C-N; $\rho$ NH <sub>2</sub>                                        |
| 936.56    | 947.52  | <b>946</b>  |             | $\rho$ CH; $\delta$ C-H                                                  |
| 948.86    | 959.96  | <b>957</b>  | <b>957</b>  | asymm. $\nu$ CH <sub>3</sub> -C-CH <sub>3</sub> ; $\rho$ CH <sub>3</sub> |
| 977.99    | 995.30  | <b>985</b>  | <b>985</b>  | $\nu$ N-C-N; $\rho$ NH <sub>2</sub> ; $\nu$ C-N; $\rho$ CH <sub>3</sub>  |
| 1032.16   | 1044.24 |             |             | $\rho$ NH <sub>2</sub> ; $\nu$ N-C; $\nu$ C-N; $\rho$ CH <sub>3</sub>    |
| 1063.77   | 1076.22 |             |             | $\rho$ NH <sub>2</sub> ; $\nu$ C-N                                       |
| 1127.72   | 1088.02 | <b>1095</b> | <b>1095</b> | $\rho$ NH <sub>2</sub> ; $\delta$ C-C-C; $\rho$ CH <sub>3</sub>          |
| 1146.70   | 1106.33 | <b>1127</b> | <b>1127</b> | $\rho$ CH <sub>3</sub> ; asymm. $\nu$ C-C-C                              |
| 1183.09   | 1141.44 | <b>1176</b> | <b>1168</b> | $\rho$ NH <sub>2</sub> ; $\rho$ CH <sub>3</sub> ; $\nu$ ring; $\nu$ CN   |
| 1198.08   | 1155.90 | <b>1203</b> |             | def. N-H; def. C-C-C; $\rho$ CH <sub>3</sub>                             |
|           |         |             | <b>1222</b> | def. C-N                                                                 |
| 1267.53   | 1222.91 |             |             | $\nu$ N-C; $\nu$ N-C; $\rho$ CH <sub>3</sub>                             |
| 1321.89   | 1275.35 | <b>1272</b> | <b>1272</b> | def. N-H; def. C-H; $\nu$ C-C-C; bend. CH <sub>3</sub>                   |
| 1349.86   | 1302.34 | <b>1307</b> | <b>1307</b> | def. C-H; $\nu$ C-C-C; bend. CH <sub>3</sub>                             |

|         |         |             |             |                                                                                     |
|---------|---------|-------------|-------------|-------------------------------------------------------------------------------------|
| 1386.46 | 1337.65 | <b>1339</b> |             | def. C-H; $\nu$ N-C-N                                                               |
| 1403.34 | 1353.94 |             |             | symm. def. CH <sub>3</sub>                                                          |
| 1404.22 | 1354.79 |             |             | def. CH <sub>3</sub> ; def. C-H; def. N-H; $\nu$ C-N-C                              |
| 1425.91 | 1375.71 | <b>1380</b> | <b>1371</b> | def. CH <sub>3</sub> ; def. C-H;                                                    |
| 1486.87 | 1434.53 |             |             | asymm. def. CH <sub>3</sub>                                                         |
| 1495.12 | 1442.49 | <b>1441</b> | <b>1445</b> | asymm. def. CH <sub>3</sub>                                                         |
| 1503.70 | 1450.76 | <b>1459</b> |             | asymm. def. CH <sub>3</sub>                                                         |
| 1506.16 | 1453.14 | <b>1465</b> |             | asymm. def. CH <sub>3</sub> ; $\nu$ N-C-N; def. N-H                                 |
| 1523.52 | 1469.89 | <b>1469</b> |             | asymm. $\nu$ CH <sub>3</sub> ; def. N-H; def. C-H                                   |
| 1549.69 | 1495.14 | <b>1519</b> |             | $\nu$ N-C-N; $\nu$ N-C-N; def. N-H; def. C-H; $\delta_{sc}$ NH <sub>2</sub>         |
| 1600.60 | 1544.26 | <b>1558</b> | <b>1522</b> | $\delta_{sc}$ NH <sub>2</sub> ; def. N-H; def. N-H; $\nu$ N-C-N; $\nu$ N-C-N; vring |
| 1647.36 | 1589.37 | <b>1598</b> |             | $\delta_{sc}$ NH <sub>2</sub> ; def. N-H; vring; $\nu$ N-C                          |
| 1667.42 | 1608.42 | <b>1627</b> |             | $\delta_{sc}$ NH <sub>2</sub> ; def. N-H; $\nu$ N=C-N                               |
| 1790.69 | 1701.15 | <b>1669</b> | <b>1620</b> | $\nu$ C=O; def. N-H; $\nu$ C-N                                                      |
| 3043.81 | 2891.62 | <b>2882</b> | <b>2875</b> | symm. $\nu$ CH <sub>3</sub>                                                         |
| 3052.29 | 2899.67 | <b>2919</b> | <b>2919</b> | $\nu$ C-H; symm $\nu$ C-H <sub>3</sub>                                              |
| 3110.96 | 2955.41 | <b>2942</b> | <b>2936</b> | asymm. $\nu$ CH <sub>3</sub>                                                        |
| 3114.24 | 2958.52 |             |             | asymm. $\nu$ CH <sub>3</sub>                                                        |
| 3141.33 | 2984.26 | <b>2971</b> | <b>2971</b> | asymm. $\nu$ CH <sub>3</sub>                                                        |
| 3144.74 | 2987.50 | <b>2989</b> |             | asymm. $\nu$ CH <sub>3</sub>                                                        |
| 3601.61 | 3421.51 | <b>3052</b> |             | symm. VN <sub>2</sub> ; $\nu$ C-H                                                   |
| 3616.11 | 3435.30 | <b>3179</b> |             | $\nu$ N-H                                                                           |
| 3639.74 | 3457.75 | <b>3248</b> | <b>3353</b> | $\nu$ N-H                                                                           |
| 3728.71 | 3542.27 | <b>3507</b> |             | asymm. $\nu$ NH <sub>2</sub>                                                        |

| Calc. | Expt. |      | Assignment |
|-------|-------|------|------------|
| Raman | Raman | SERS |            |

| Enol form | Scaled  |             |             |                                                                                                |
|-----------|---------|-------------|-------------|------------------------------------------------------------------------------------------------|
| 177.16    | 179.23  | <b>173</b>  |             | Skeletal vibration                                                                             |
| 197.21    | 199.51  | <b>193</b>  |             | Skeletal vibration                                                                             |
|           |         |             | <b>210</b>  | Ag-O vibration                                                                                 |
| 206.32    | 208.73  | <b>219</b>  |             | Skeletal vibration                                                                             |
| 227.55    | 280.79  |             |             | Skeletal vibration                                                                             |
| 241.33    | 244.15  |             |             | Skeletal vibration                                                                             |
| 273.23    | 276.42  |             |             | Skeletal vibration                                                                             |
| 352.89    | 357.02  | <b>360</b>  | <b>327</b>  | def. C-N; def. O-C-N                                                                           |
| 391.42    | 395.99  |             |             | def. CH <sub>3</sub> -C-CH <sub>3</sub>                                                        |
| 424.24    | 429.20  | <b>420</b>  |             | $\gamma$ C-N-C                                                                                 |
| 484.34    | 490.00  | <b>448</b>  | <b>448</b>  | $\gamma$ N-H                                                                                   |
| 507.21    | 513.14  | <b>489</b>  | <b>500</b>  | $\delta$ ring; def. C-C-N                                                                      |
| 541.98    | 548.32  | <b>565</b>  | <b>593</b>  | $\delta$ ring; $\delta t_w$ NH <sub>2</sub>                                                    |
| 553.86    | 560.34  |             |             | $\delta t_w$ NH <sub>2</sub> ; $\gamma$ O-H                                                    |
| 558.62    | 565.15  | <b>578</b>  |             | $\delta t_w$ NH <sub>2</sub> ; $\gamma$ O-H                                                    |
| 588.21    | 595.09  | <b>609</b>  | <b>643</b>  | $\delta$ ring                                                                                  |
| 629.15    | 636.51  | <b>640</b>  | <b>670</b>  | $\gamma$ ring; def. C-N-C                                                                      |
| 821.06    | 830.66  | <b>746</b>  | <b>746</b>  | $\nu$ CH <sub>3</sub> -C-CH <sub>3</sub>                                                       |
|           |         |             | <b>799</b>  | $\gamma$ ring                                                                                  |
| 821.25    | 830.85  | <b>853</b>  | <b>853</b>  | $\nu$ CH <sub>3</sub> -C-CH <sub>3</sub>                                                       |
| 936.85    | 947.81  |             |             | $\rho$ CH <sub>3</sub> ; def. C-H; $\nu$ CH <sub>3</sub> -C-CH <sub>3</sub>                    |
| 949.19    | 960.26  | <b>957</b>  | <b>957</b>  | $\rho$ CH <sub>3</sub> ; def. C-H; $\nu$ CH <sub>3</sub> -C-CH <sub>3</sub>                    |
| 970.21    | 981.56  | <b>985</b>  | <b>985</b>  | $\rho$ NH <sub>2</sub> ; $\nu$ CH <sub>3</sub> -C-CH <sub>3</sub> ; $\delta$ ring              |
| 988.60    | 1000.17 |             |             | $\delta$ ring                                                                                  |
| 1049.28   | 1061.56 |             |             | $\rho$ NH <sub>2</sub> ; $\nu$ CN; def. O-H                                                    |
| 1101.06   | 1062.30 |             |             | $\delta$ ring; $\nu$ C-O; def. O-H; $\nu$ C-N;<br>def. C-N-C                                   |
| 1142.86   | 1102.63 | <b>1095</b> | <b>1095</b> | $\rho$ CH <sub>3</sub> ; $\rho$ NH <sub>2</sub> ; $\delta$ ring; def C-O; def. O-H; def. C-N-C |
| 1146.56   | 1106.20 | <b>1127</b> |             | asymm. $\nu$ CH-C-CH <sub>3</sub> ; $\rho$ CH <sub>3</sub>                                     |
| 1187.00   | 1145.22 |             |             | $\rho$ NH <sub>2</sub> ; $\rho$ CH <sub>3</sub> ; def. C-N-C; def. O-H                         |
| 1215.91   | 1153.11 | <b>1176</b> |             | def. O-H; $\nu$ N-C; def. CH <sub>3</sub> -C-CH <sub>3</sub>                                   |
| 1261.82   | 1216.92 | <b>1203</b> |             | def. O-H; $\nu$ N-C                                                                            |
|           |         |             | <b>1228</b> | def. C-O; def. C=N                                                                             |
| 1306.44   | 1260.45 | <b>1272</b> |             | def. O-H; def. N-H; $\rho$ NH <sub>2</sub> ; $\nu$ ring                                        |
| 1349.35   | 1301.85 | <b>1307</b> |             | def. C-H; asymm. $\nu$ CH <sub>3</sub> -C-CH <sub>3</sub>                                      |
| 1392.73   | 1343.70 | <b>1339</b> |             | def. C-H; def N-H                                                                              |
| 1403.90   | 1354.48 |             |             | asymm. $\nu$ CH <sub>3</sub> -C-CH <sub>3</sub> ; symm def. CH <sub>3</sub>                    |
| 1413.39   | 1363.64 |             |             | def. N-H; def. O-H; symm. def. CH <sub>3</sub> ; $\nu$ ring                                    |

|         |         |             |             |                                                                                                          |
|---------|---------|-------------|-------------|----------------------------------------------------------------------------------------------------------|
| 1427.77 | 1377.51 | <b>1380</b> | <b>1371</b> | symm. def. CH <sub>3</sub> ; def. C-H; symm. vCH <sub>3</sub> -C-CH <sub>3</sub> ; def. O-H;<br>def. N-H |
| 1478.91 | 1426.85 |             |             | def. N-H; vring; def. O-H; vC-O; def. C-H                                                                |
| 1486.51 | 1434.18 |             |             | asymm. def. CH <sub>3</sub>                                                                              |
| 1498.57 | 1445.8  | <b>1441</b> | <b>1441</b> | asymm. def. CH <sub>3</sub> ; $\delta_{sc}$ NH <sub>2</sub> ; vC-N; def. N-H; def. C-H                   |
| 1502.28 | 1449.40 |             |             | $\delta_{sc}$ NH <sub>2</sub> ; asymm. def. CH <sub>3</sub> ; vC-N; vring; def. N-H                      |
| 1504.40 | 1451.44 | <b>1459</b> | <b>1459</b> | asymm. def. CH <sub>3</sub> ; vring                                                                      |
| 1522.29 | 1468.70 | <b>1465</b> |             | asymm. def. CH <sub>3</sub>                                                                              |
| 1583.51 | 1527.77 | <b>1496</b> |             | $\delta_{sc}$ NH <sub>2</sub> ; vring; def. C-H; vC-N                                                    |
| 1606.80 | 1550.24 | <b>1558</b> | <b>1543</b> | $\delta_{sc}$ NH <sub>2</sub> ; def. C-H; vring; def. N-H; vC-N                                          |
| 1649.97 | 1591.89 | <b>1598</b> | <b>1585</b> | $\delta_{sc}$ NH <sub>2</sub> ; vring; vC-N; def. O-H                                                    |
| 1658.35 | 1575.43 | <b>1627</b> |             | $\delta_{sc}$ NH <sub>2</sub> ; vring; vC-N; def. O-H; def. N-H                                          |
| 3043.23 | 2891.07 | <b>2882</b> | <b>2875</b> | symm. vCH <sub>3</sub>                                                                                   |
| 3051.01 | 2898.46 | <b>2919</b> | <b>2919</b> | symm. vC-H; symm vCH <sub>3</sub>                                                                        |
| 3109.74 | 2954.25 |             |             | asymm. vCH <sub>3</sub>                                                                                  |
| 3133.09 | 2957.43 | <b>2942</b> | <b>2936</b> | asymm. vCH <sub>3</sub>                                                                                  |
| 3142.34 | 2985.23 | <b>2971</b> | <b>2971</b> | asymm. vCH <sub>3</sub>                                                                                  |
| 3145.62 | 2988.33 | <b>2989</b> |             | asymm. vCH <sub>3</sub>                                                                                  |
| 3628.26 | 3446.85 | <b>3052</b> |             | symm. VNH <sub>2</sub> ; vC-H                                                                            |
| 3650.74 | 3468.20 | <b>3248</b> |             | vN-H                                                                                                     |
| 3771.90 | 3583.30 |             |             | asymm. vNH <sub>2</sub>                                                                                  |
| 3784.42 | 3595.20 | <b>3507</b> |             | vO-H                                                                                                     |

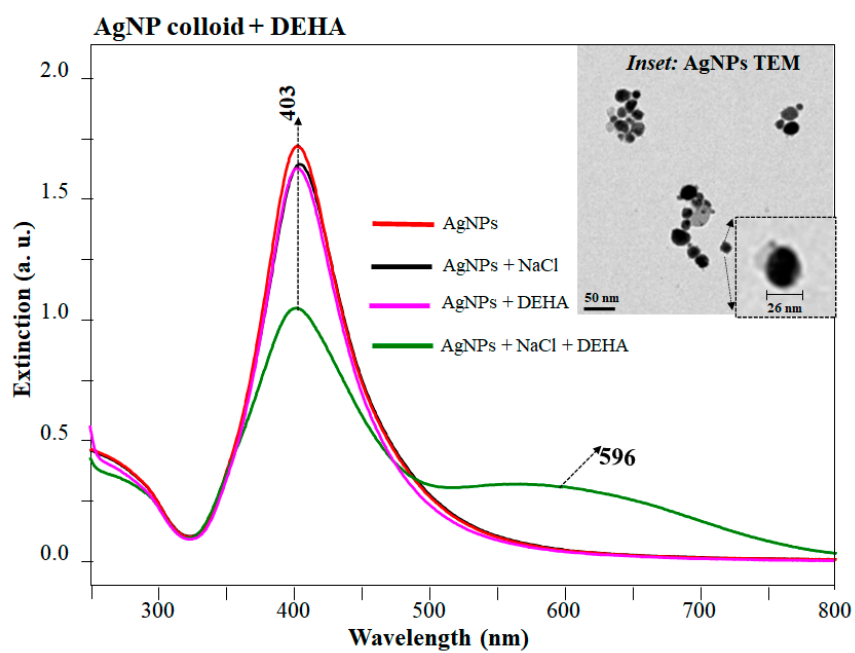

Figure S1: UV-Vis extinction spectra of the AgNPs in the absence and presence of NaCl salt (0.05 M) and DEHA ( $10^{-5}$  M). The insets show TEM image and diameter of AgNPs, respectively.

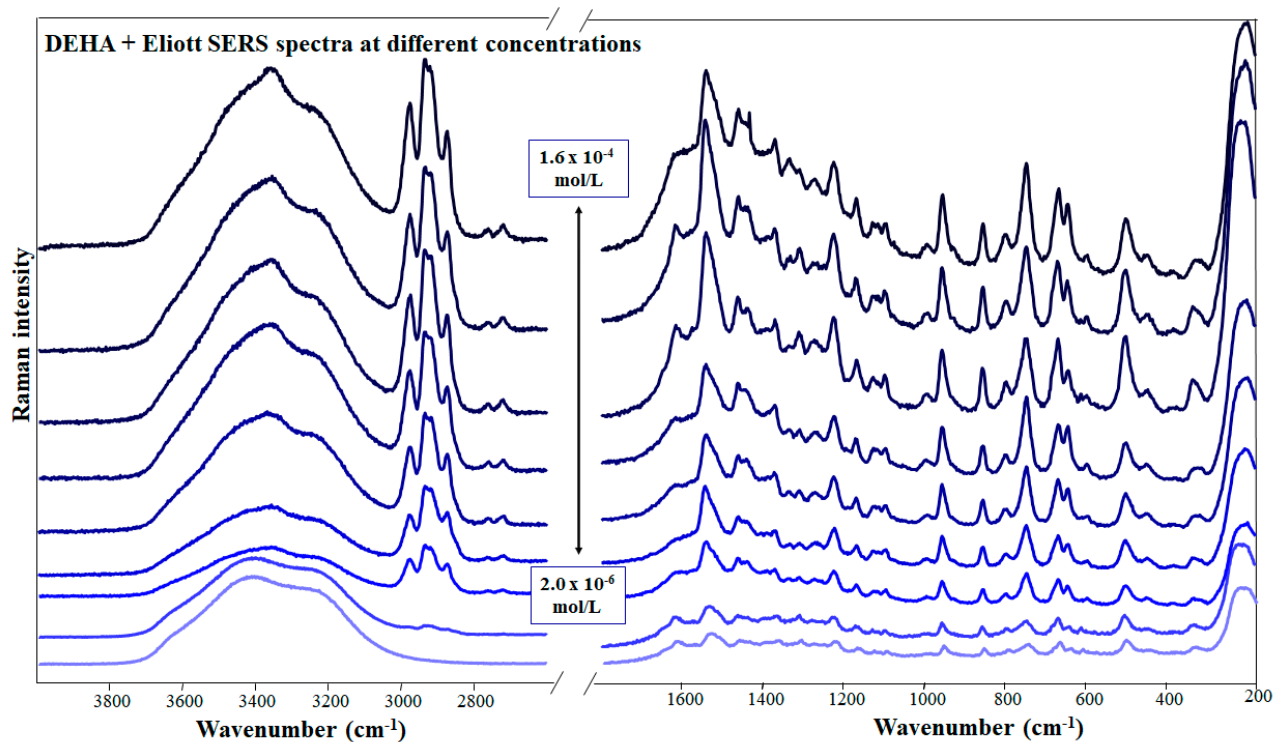

**Figures S2:** DEHA+Eliott soil SERS spectra at different concentrations of DEHA in AgHx colloid at pH 8.5. The concentration of the Eliott soil was kept constant to 1 mg/mL while changing the concentration of DEHA. The concentration of DEHA was varied from  $2.0 \times 10^{-6}$  to  $1.6 \times 10^{-4}$ . Laser line at 532 nm.

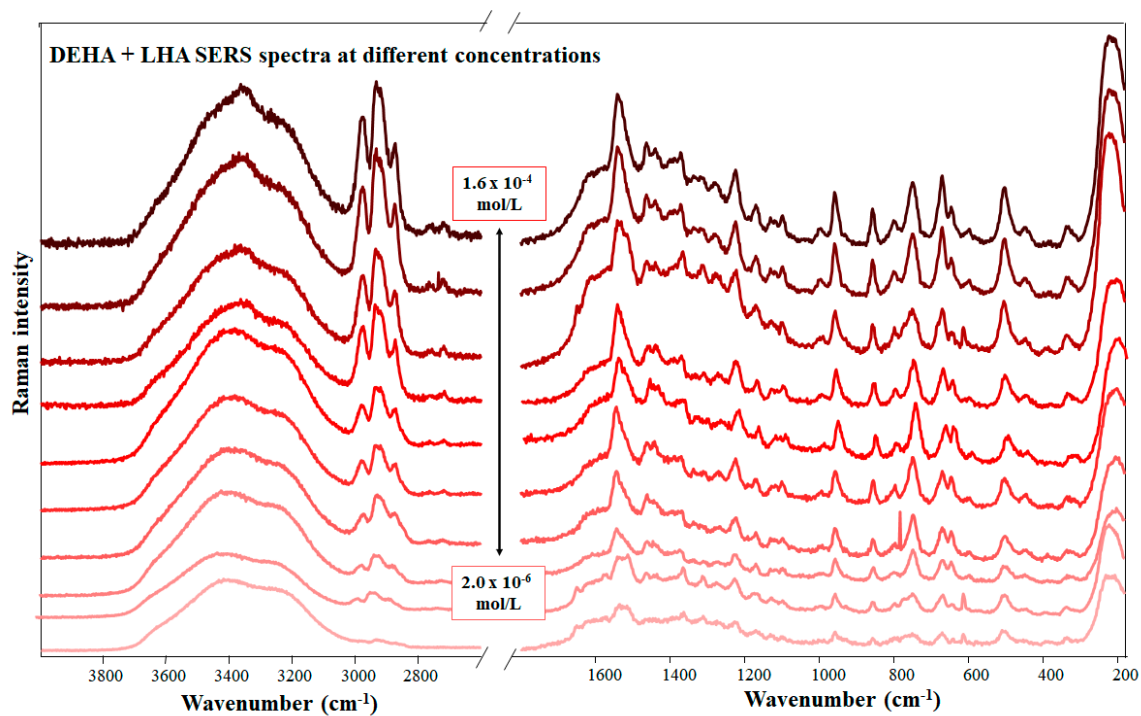

**Figure S3:** DEHA+LHA SERS spectra at different concentrations of DEHA in AgHx colloid at pH 8.5. The concentration of the Leonardite humic acid was kept constant to 1 mg/mL while changing the concentration of DEHA. The concentration of DEHA was varied from  $2.0 \times 10^{-6}$  to  $1.6 \times 10^{-4}$ . Laser line at 532 nm.



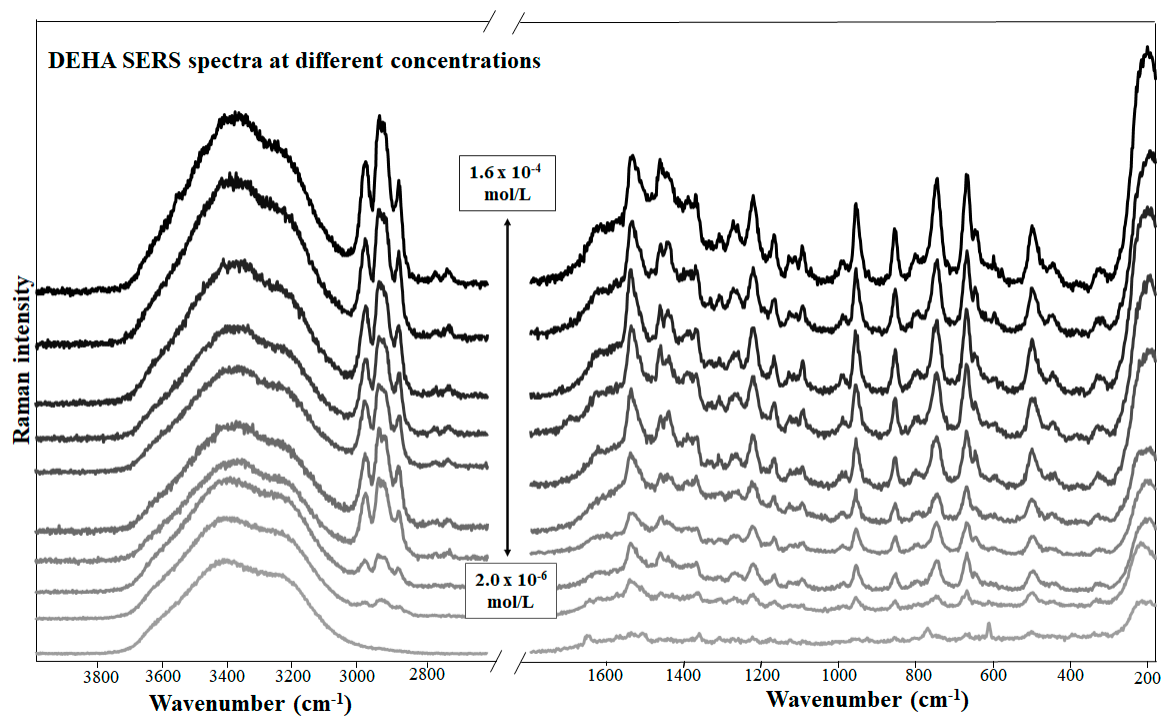

**Figure S4:** DEHA SERS spectra at different concentrations in AgHx colloid at pH 8.5. Final concentration of DEHA indicated in the figure; initial concentration of DEHA is from  $2.0 \times 10^{-6}$  to  $1.6 \times 10^{-4}$ . Laser line at 532 nm.
